# Supplementary material for: An Internet-Based Intervention (Mamma Mia) for Postpartum Depression: Mapping the Development from Theory to Practice
Source: PubMed Central journal article supplement (PMC4704906; doi:10.2196/resprot.4858), 2015-10-12
Supplement: resprot_v4i4e120_app1.pdf [file resprot_v4i4e120_app1.pdf]

# Multimedia Appendix 1: Screenshots\*

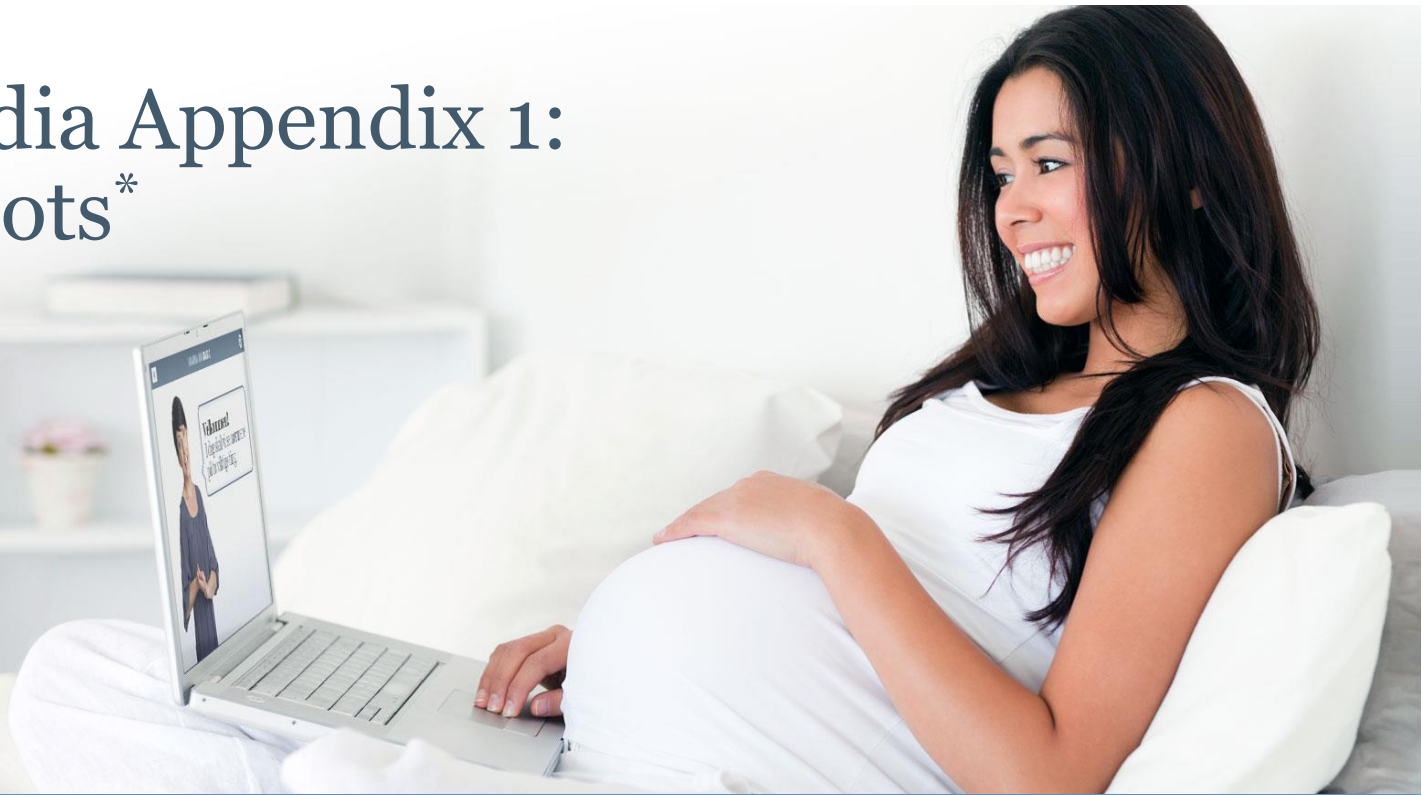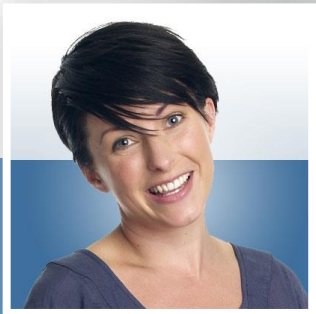

*Mamma*  *Mia*

\*In this presentation, some screenshots are taken out of their context and may not fully represent Mamma Mia.

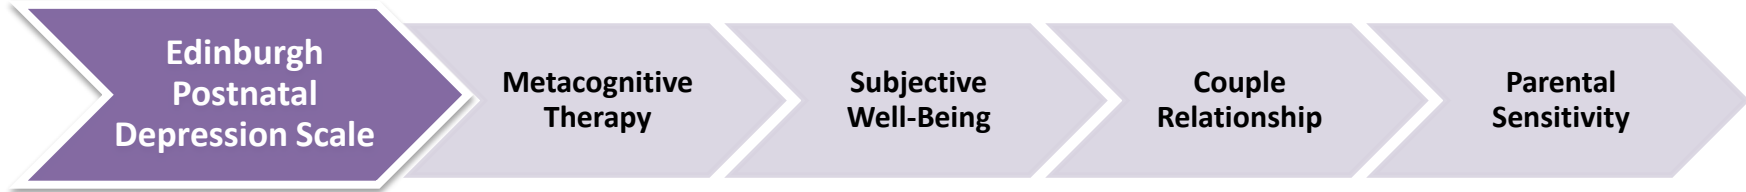

# Screening for depressive symptoms

Presenting the rationale for assessing depressive symptoms

In a friendly and empathic tone-of-voice, using a guide to give the program a 'human touch'

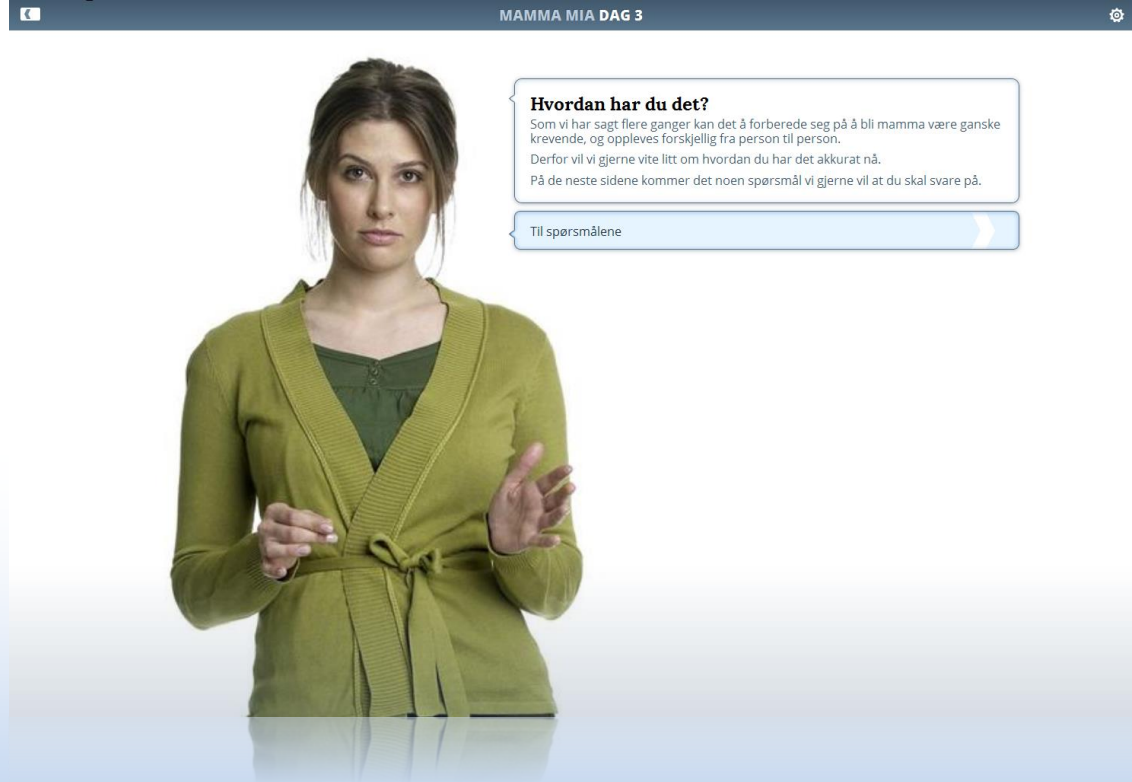

# Screening for depressive symptoms

Question from the Edinburgh Postnatal Depression Scale:

*'I have been able to laugh and see the funny side of things'*

MAMMA MIA DAG 3

**Hvordan har du det?**  
Kryss av det alternativet som stemmer best med hvordan du har følt deg de siste 7 dagene. Ikke bare slik du har det i dag.

Har du de siste 7 dagene kunnet le og se det komiske i en situasjon?

- Like mye som vanlig
- Ikke fullt så mye som jeg pleier
- Betydelig mindre enn jeg pleier
- Ikke i det hele tatt

Neste spørsmål

# Screening for depressive symptoms

Question from the Edinburgh Postnatal Depression Scale:

*'I have looked forward with enjoyment to things'*

MAMMA MIA DAG 3

**Hvordan har du det?**  
(forts.)

Har du de siste 7 dager gledet deg til ting som skulle skje?

- Like mye som vanlig
- Ikke fullt så mye som jeg pleier
- Betydelig mindre enn jeg pleier
- Ikke i det hele tatt

Neste spørsmål

## Screening for depressive symptoms

Question from the Edinburgh Postnatal Depression Scale:

*'I have felt scared or panicky for no very good reason'*

MAMMA MIA DAG 3

**Hvordan har du det?**  
(forts.)

Har du de siste 7 dager vært nervøs eller bekymret uten grunn?

- Nei, slett ikke
- Nesten aldri
- Ja, iblant
- Ja, veldig ofte

Neste spørsmål

# Screening for depressive symptoms

EPDS-score below 10 results in supportive feedback

Explain why it is important to re-assess depressive symptoms

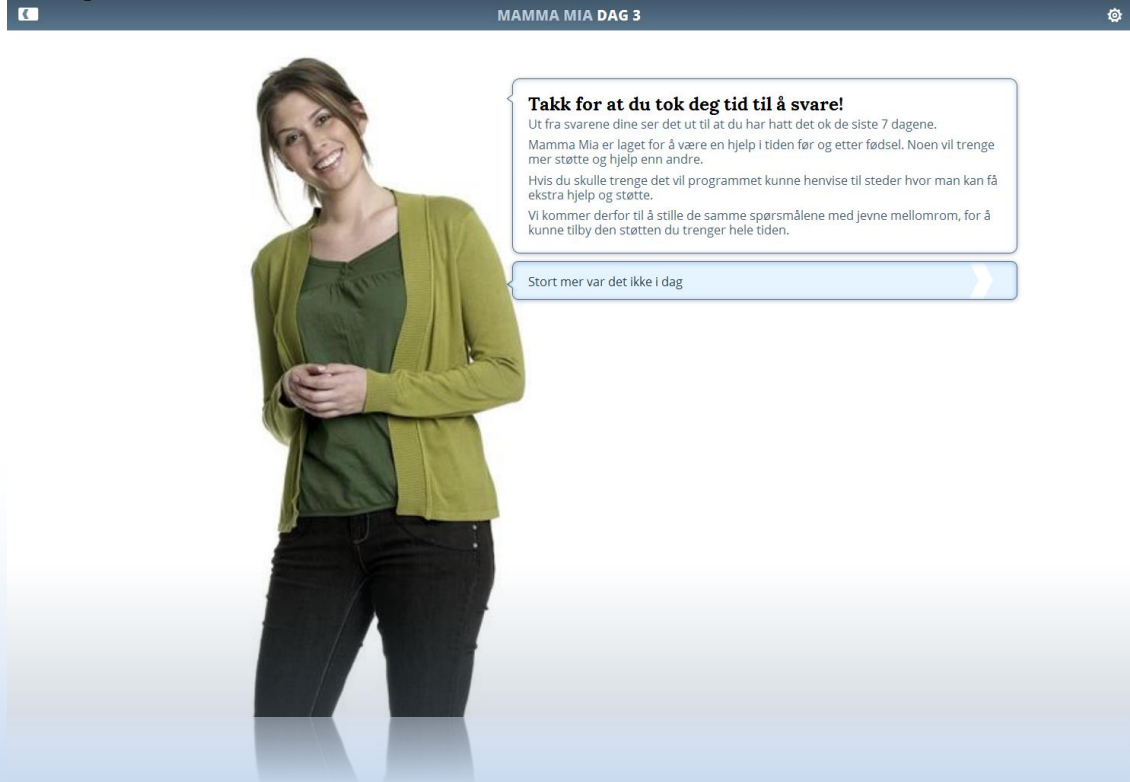

**Edinburgh  
Postnatal  
Depression  
Scale**

**Metacognitive  
Therapy**

**Subjective  
Well-Being**

**Couple  
Relationship**

**Parental  
Sensitivity**



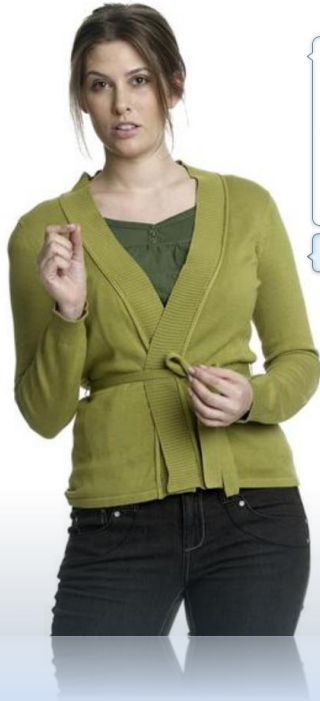**Takk for at du tok deg tid til å svare!**

Svarene dine viser at de siste 7 dagene har vært vanskelige for deg. Vi vil gjerne at du tenker litt igjennom:

Er det noe spesielt som har skjedd de siste dagene som gjør at du har det tungt nå? Eller har du hatt det slik lenge?

Har du hatt det slik tidligere? Hvis du har opplevd å ha det slik tidligere, hva gjorde du da? Fikk du hjelp av noen?

Programmet vil hjelpe deg så godt det kan, men i tillegg anbefaler vi deg å snakke med noen om hvordan du har det.

Søk støtte

## Help and support for depressive symptoms

EPDS-score of 10 or higher results in supportive feedback

Self-reflection is encouraged:

*'Is there anything special that has happened lately or have felt this way for quite a while?'*

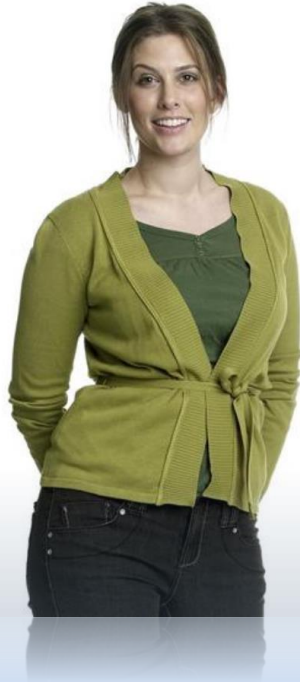

### Gjør en avtale

Sett av tid til å snakke med noen. Ring og avtal tid nå med det samme. Da har du tatt det første skrittet til å få det bedre.

Hvis du ønsker profesjonell hjelp er fastlegen den første du bør ringe.

Der kan du få henvisning videre til psykolog eller annen profesjonell hjelp om du ønsker det.

Hvis du trenger noen å snakke med akkurat nå, kan du ringe Mental Helses Hjelpetelefon: 116 123.

Klikk her for å gå videre

## Help and support for depressive symptoms

Encourage help-seeking, e.g., via the general physician

Call a mental health hotline if you need someone to talk to right away

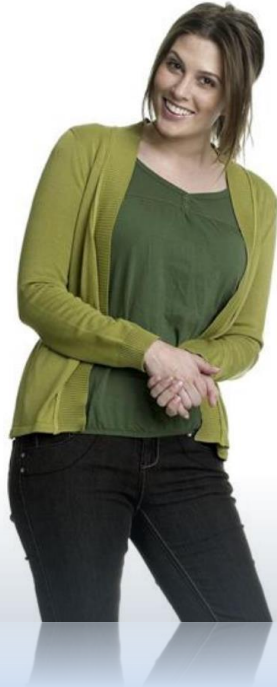**Stemmen er et fantastisk instrument!**

Ikke bare til å synge med, men for å håndtere tanker og følelser også.  
Nå skal lære å bruke den på en ny måte. Til å oppnå frakoplet oppmerksomhet.  
Altså til å akseptere at tanker kommer, men samtidig skape distanse til dem.

Her er en liten demonstrasjon

## Help and support for depressive symptoms

Mamma Mia provides immediate online help and support

Exercises to support psychological flexibility

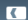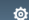

**Hva synes du om å oppdage at melken er sur?**

Etter at du har tatt en solid slurk!

Når du starter lydfilen får du høre en som har gjort akkurat det. Han klarer ikke å kvitte seg med tanken og følelsen av den sure melken.

Derfor gjentar han sur melk om og om igjen.

Klikk på Play og hør godt etter. Husk å skru opp lyden på PC-en.

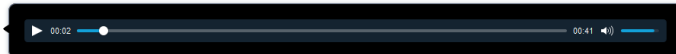

Hva var det som skjedde?

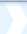

## Help and support for depressive symptoms

Demonstration of a technique for cognitive defusion

Promoting defusion in the presence of negative thoughts and feelings

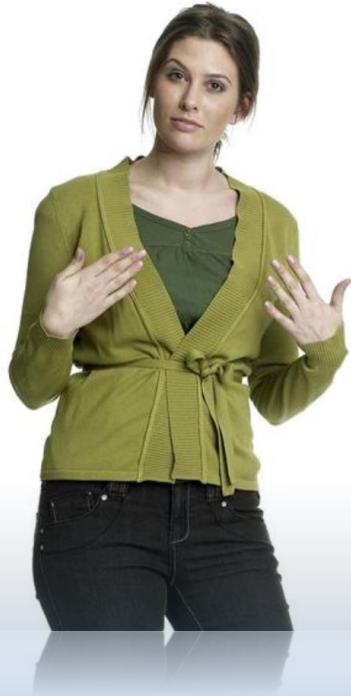**For du kan bruke teknikken på alle tanker.**

Tenk på noe du synes smaker spesielt vondt. Som du absolutt ikke liker å spise. Gjenta ordet mange ganger. Minst 50! På samme måte som han som drakk sur melk.

Hva skjer? Til slutt blir det bare en lyd som kommer ut av munnen din.

Til neste gang kan du bruke denne teknikken hvis en negativ tanke dukker opp. Gjenta ordet du assosierer med tanken, igjen og igjen.

Da vil du merke at ordet mister sin mening.

Nå lurer vi på..

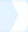

## Help and support for depressive symptoms

Translating defusion to everyday life

Encourage to give it a try and use it the next time a negative thought occurs.

**Edinburgh  
Postnatal  
Depression  
Scale**

**Metacognitive  
therapy**

**Subjective  
Well-Being**

**Couple  
Relationship**

**Parental  
Sensitivity**

# Prescriptions for the good life – Stress management

Stress and common reactions to stress explained

Expecting a baby can be a stressful event

MAMMA MIA DAG 4



**Stress betyr "vær på vakt".**  
Stress er en reaksjon på noe som kan være en trussel mot deg. Eller bekymringer og tanker på noe som truer deg.  
Disse tankene henger ofte sammen med negative følelser som frykt, sinne, frustrasjon, eller tristhet.  
Det er logisk at det er sånn. Hvis stress hadde gitt positive følelser som glede og trygghet, ville du jo oppsøkt situasjoner som ga stress.  
Men da ville du utsatt deg selv for mange farer.

Derfor betyr stress i stedet...

# Prescriptions for the good life – Stress management

Instilling confidence in stress management techniques

Introducing mindfulness

MAMMA MIA DAG 4



**Det finnes effektive metoder.**  
Et effektivt tiltak mot stress er å lære seg å være tilstede i øyeblikket. Ikke være her og der hele tiden. Ikke bare tenke på neste dag, neste uke, neste år. Eller hva som kunne ha skjedd hvis...  
Vi må altså forsøke å være tilstede her og nå. Da får vi bedre kontakt med oss selv. Og blir flinkere til å nyte øyeblikket.  
På fagspråket heter dette oppmerksomt nærvær. På engelsk heter det mindfulness.  
Denne metoden har vist seg å ha god effekt. Både på humør, stress og søvnkvalitet.

Nå skal du få lære deg det



# Prescriptions for the good life – Stress management

Audio-guided mindfulness instructions

Downloadable audio file for homework and practice

The screenshot shows a web interface for an audio-guided mindfulness exercise. At the top, a dark blue header contains a home icon, the text "MAMMA MIA DAG 4", and a settings icon. Below the header, a white box with a light blue border contains the exercise title "Pust langs ryggsoylen." followed by instructions in Norwegian: "Denne siden har en lydfil med en øvelse som tar ca. 5 minutter. Du kan ta vare på lydfilen ved å klikke på [Pust Langs Ryggsoylen](#) og lagre den i dine favoritter, slik at du kan bruke den når det passer deg. Øvelsen virker bedre når du har gjort den noen ganger. Gjør den hver dag! Husk å skru opp lyden på PC-en din. Du kan godt bruke et headset. Klikk på Play-knappen når du er klar til å begynne." Below the text is a black audio player with a play button, a progress bar showing 00:01 / 04:29, and a volume icon. At the bottom of the player is a light blue button with a right-pointing arrow and the text "Ikke klikk her før du er ferdig med øvelsen".

**Edinburgh  
Postnatal  
Depression  
Scale**

**Metacognitive  
therapy**

**Subjective Well-  
Being**

**Couple  
Relationship**

**Parental  
Sensitivity**

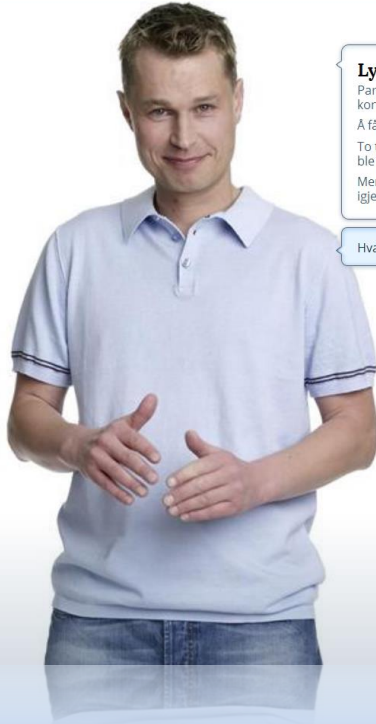**Lykkelige par holder seg oppdatert.**

Par som har detaljerte kjærlighetskart er bedre i stand til å håndtere stress og konflikter.

Å få barn for første gang oppleves som stressende for de fleste par.

To tredjedeler sier de fikk et dramatisk fall i tilfredshet i forholdet, første gang de ble foreldre.

Mens den resterende tredjedelen ikke har hatt dette fallet. Og halvparten av disse igjen opplevde at ekteskapet ble bedre.

Hva kan dette komme av? >

## Building closeness and partner intimacy

Expecting a baby can be distressing for the couple

Buffering effects of relationship satisfaction explained

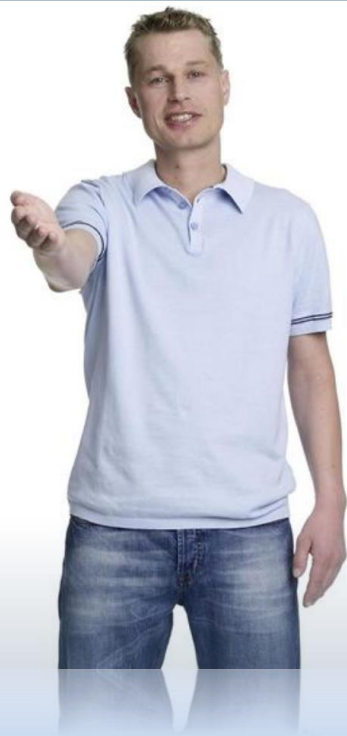**Det har med detaljerte kjærlighetskart å gjøre.**

Det typiske for dem som opplevde at ekteskapet ble bedre var at de hadde som vane å holde seg oppdatert på hva den andre tenker og føler.

De var derfor bedre på foreldrerollen, da den kom i tillegg.

Med andre ord. Selv om dere er veldig opptatt av barnet akkurat nå, bør dere sørge for å få litt tid til hverandre også, hver dag.

Del drømmer, håp, frykt, tanker og følelser. Eller rett og slett, spør om hvordan har dagen til den andre vært.

Her er en øvelse dere kan gjøre

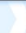

## Building closeness and partner intimacy

Satisfied couples are up-to-date on each other's inner life

Show an interest in your partner and share your thoughts and feelings

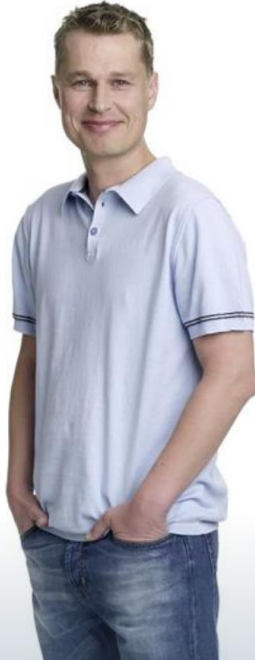

### 20 spørsmål til hverandre.

Det er få gaver dere kan gi hverandre som overgår følelsen av å være forstått og elsket.

En måte å gi hverandre denne gaven er å lære hverandre å kjenne.

Last ned, skriv ut og følg instruksjonene som ligger i dokumentet.

[20 spørsmål til hverandre](#)

Nøkkelen til å utvide kjærlighetskartet

## Building closeness and partner intimacy

Homework: Ask each other 20 questions to stay up-to-date

Downloadable documents to ease partner involvement

**Edinburgh  
Postnatal  
Depression  
Scale**

**Metacognitive  
therapy**

**Subjective Well-  
Being**

**Couple  
Relationship**

**Parental  
Sensitivity**

# Getting to know your baby – Graded comfort

A way to comfort your baby when s/he is crying

Wait, watch, and wonder if the baby responds or needs more support

MAMMA MIA DAG 32



**Gradert trøst.**  
Vi har snakket mye om at du ved å vente, se og undre blir kjent med barnets signaler, og gir barnet tid til å respondere.  
Gradert trøst går ut på å bruke denne teknikken når barnet ditt er opprørt eller stresset.  
Du starter med å gi litt støtte. Venter og ser hvordan barnet responderer. Roer barnet seg ned eller trenger det mer trøst?

Vi tar en titt på Mia igjen!

## Getting to know your baby – Graded comfort

Video demonstration of the states in the sleep-wake cycle

Video demonstration of graded comforting; step-by-step

MAMMA MIA DAG 32

Mia er her i tilstand 6.  
La oss ta en titt på videoen.



00:03 00:18

Fortsett

The image shows a video player interface. At the top, there is a dark blue header with the text 'MAMMA MIA DAG 32' and a settings icon on the right. Below the header, a white text box contains the title 'Mia er her i tilstand 6.' and the subtitle 'La oss ta en titt på videoen.'. The main area of the player is a video frame showing a baby lying in a crib, wearing a white patterned onesie. Below the video frame is a progress bar with a play/pause button on the left, a progress indicator, and a volume icon on the right. The progress bar shows the video is at 00:03 out of 00:18. Below the video frame, there is a light blue button with the text 'Fortsett' and a right-pointing arrow.



# Getting to know your baby – Graded comfort

Step-by-step instructions;  
graded comforting explained

Reminding that each step should  
last 10–15 seconds

MAMMA MIA DAG 32

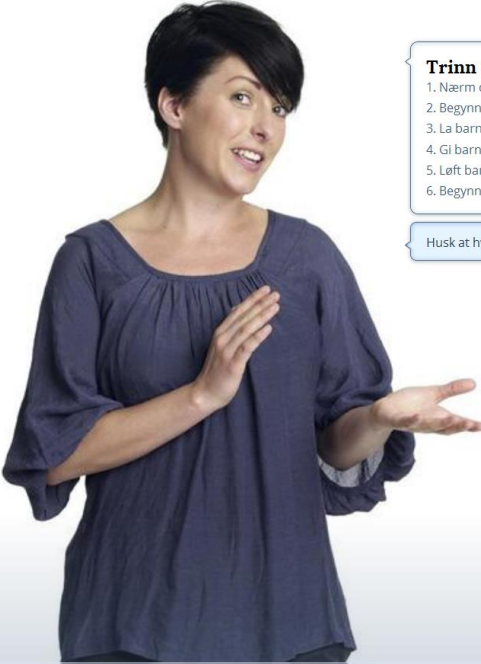

**Trinn for trinn**

1. Nærm deg ved å vise ansiktet ca. 20-40 cm fra barnets ansikt.
2. Begynn å snakke med barnet.
3. La barnet få en finger å holde i.
4. Gi barnet en finger som det kan holde i den andre hånden også.
5. Løft barnet og legg det inntil bryst/skulderparti.
6. Begynn å vugge eller gyng barnet i ro.

Husk at hver trinn skal vare i 10-15 sekunder!

Mamma Mia  
Fremmer trivsel og helse i tiden før og etter fødsel

**Velkommen til Mamma Mia!**  
Klikk på de enkelte dagene i oversikten under for å se innholdet.

### Dager i programmet

|                                     |                  |
|-------------------------------------|------------------|
| ▶ 1 Et annerledes program           | IKKE GJENNOMFØRT |
| ▶ 2 Familiestrukturen forandrer seg | IKKE GJENNOMFØRT |
| ▶ 3 Hvordan går det med deg?        | IKKE GJENNOMFØRT |
| ▶ 4 Stressmestring                  | IKKE GJENNOMFØRT |
| ▶ 5 Hold deg aktiv                  | IKKE GJENNOMFØRT |
| ▶ 6 Parforholdet endrer seg         | IKKE GJENNOMFØRT |
| ▶ 7 Din for evig                    | IKKE GJENNOMFØRT |

## Program homepage

All program content and materials gathered in one place

24/7 access to review sessions and download materials

**For a demonstration, please visit: [Mamma Mia](#)**
